# Supplementary material for: Transcriptome sequencing reveals CHD1 as a novel fusion partner of RUNX1 in acute myeloid leukemia with t(5;21)(q21;q22)
Source: Springer Nature journal article supplement (doi:10.1186/s12943-015-0353-x), 2015-04-10

**Figure S1**

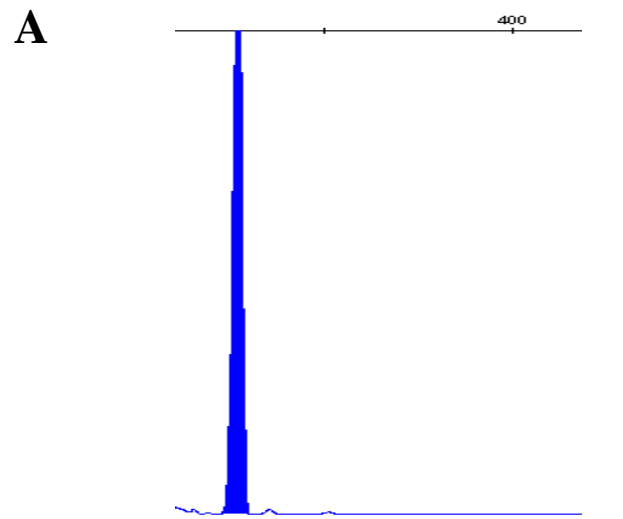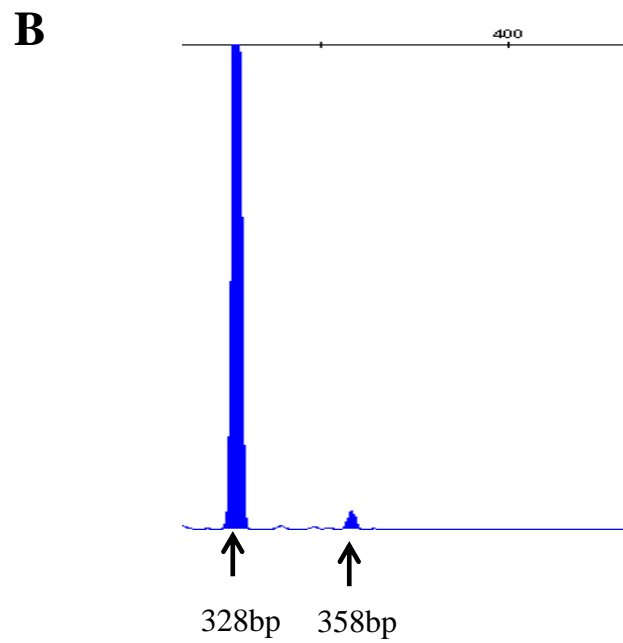

Supplement: MOESM1 [file 9763050]
